**Title: In vivo visualization of nitrate dynamics using a genetically encoded biosensor**

**Authors:** Yen-Ning Chen<sup>1</sup>, Heather Cartwright<sup>2</sup>, and Cheng-Hsun Ho<sup>1\*</sup>

**Affiliations:**

<sup>1</sup>Agricultural Biotechnology Research Center, Academia Sinica, Taipei, 115, Taiwan.

<sup>2</sup>Advanced Imaging Center, Howard Hughes Medical Institute Janelia Research Campus, Ashburn, VA 20147, USA

\*Corresponding author. Email: [zcybele3@sinica.edu.tw](mailto:zcybele3@sinica.edu.tw)

**Abstract:** Nitrate (NO<sub>3</sub><sup>-</sup>) uptake and distribution are critical to plant life. Although the upstream regulation of nitrate uptake and downstream responses to nitrate in a variety of cells have been well-studied, it is still not possible to directly visualize the spatial and temporal distribution of nitrate with high resolution at the cellular level. Here, we report a nuclear-localized, genetically encoded biosensor, nlsNitraMeter3.0, for the quantitative visualization of nitrate distribution in *Arabidopsis thaliana*. The biosensor tracked the spatiotemporal distribution of nitrate along the primary root axis and disruptions by genetic mutation of transport (low nitrate uptake) and assimilation (high nitrate accumulation). The developed biosensor effectively monitors nitrate concentrations at cellular level in real time and spatiotemporal changes during the plant life cycle.

**One-Sentence Summary:** A genetically encoded biosensor for in vivo visualization of spatiotemporal nitrate levels at a cellular resolution.

## Main Text:

The plant root is essential to nutrient uptake. Nitrate ( $\text{NO}_3^-$ ), is a major nitrogen source and is one of the most limiting factors in agricultural production (1, 2). Within the root, nitrate levels differ dramatically between root cell types (3, 4). Under nitrate limitation, plants can optimize morphological and physiological parameters, for example, root growth can be directed towards nutrient deposits in the soil, the root surface area can be locally increased, or the transporter density on the membrane can be altered. Moreover, metabolic conversion, storage and translocation of nitrogen compounds are modified (5, 6). In order to adjust these parameters, plants have to monitor both the external and intracellular nitrate concentrations to determine  $\text{NO}_3^-$  acquisition needs by plant roots.

$\text{NO}_3^-$  uptake predominantly occurs from the soil/rhizosphere into roots. Once in a root cell,  $\text{NO}_3^-$  ions can diffuse within the symplasm from cell to cell.  $\text{NO}_3^-$  ions can serve as an osmotic compound or be assimilated in the root to produce organic nitrogen for cellular growth either locally or be loaded into xylem vessels for transport to the shoot (7).  $\text{NO}_3^-$  uptake, the rate of  $\text{NO}_3^-$  acquisition by the plant, depends on the surface area of the root, and the environmental factors that affect root growth will also affect  $\text{NO}_3^-$  capacity. Furthermore, the root system is very plastic, and  $\text{NO}_3^-$  availability itself strongly affects root development. However, we still do not fully understand the most fundamental aspects about  $\text{NO}_3^-$  uptake by plant roots, such as: which tissue(s) is(are) responsible for  $\text{NO}_3^-$  uptake? is  $\text{NO}_3^-$  uptake distributed all along the root? and, is  $\text{NO}_3^-$  uptake restricted to specific zones only? In addition, the exact intercellular path from the outer root layers towards the central stele is only hypothesized and not experimentally proven. It has proven difficult to track nitrate molecules within the plant tissue. Some studies have reported nitrate detection, however, most of these techniques either lack spatial resolution, e.g. radioactive isotope (8, 9) and the Griess method (10), or have limitations to their use, e.g. vibrating electrodes (11, 12), positron-emitting tracer imaging (13, 14), or secondary ion mass spectrometry (15).

Other ions have been monitored in living tissue through Förster Resonance Energy Transfer (FRET)-based biosensors. FRET sensors are fusion proteins that report on a target molecule through interactions with a sensory domain that cause changes in a protein conformation (16). These conformational changes affect the efficiency of energy transfer from a fused FRET donor fluorescent protein to a fused FRET acceptor fluorescent protein. Changes in energy transfer can be detected by measuring changes

in the relative intensity of the two fluorescent proteins (ratio change) after excitation of the donor; the ratio change reports target molecule concentration. We report here the development of a biosensor to monitor the dynamics of  $\text{NO}_3^-$  in plants.

The bacterial NasR protein is a soluble receptor that contains the NIT (nitrate- and nitrite-sensing) domain, which serves as an  $\text{NO}_3^-$  binding pocket (17-19). We generated a biosensor based on a FRET biosensor by cloning the NIT domain as a Gateway Entry clone and then recombining it with a previously designed Gateway destination vector (pDR-FLIP39) that carries enhanced dimerization (ed) variant of Aphrodite (edAFP), as the FRET acceptor, and of enhanced cyan fluorescent protein (edeCFP) as the FRET donor (20). The fusion proteins were expressed in protease-deficient yeast, purified (20), and analyzed in a spectrofluorometer for  $\text{NO}_3^-$ -dependent alterations in the fluorescence emission curves after FRET donor excitation at 428 nm (donor excitation (Dx); Fig. S1). Within the NIT domain fusion protein, the fluorophores were within Förster distance, as evidenced by resonance energy transfer; however,  $\text{NO}_3^-$  addition did not trigger a significant change in the energy transfer rate between the emission at 530 nm (donor excitation acceptor emission, DxAm) and the emission at 488 nm (donor excitation donor emission, DxDm) that could act as a FRET ratio change sensor ( $\Delta\text{DxAm}/\text{DxDm}$ ). The initial emission ratio ( $\Delta\text{DxAm}/\text{DxDm}$ ) of the NIT domain fusion protein was greater than 1.2 (Fig. S1). To further optimize the sensor, we tested sensor replacing the NIT domain with the entire NasR protein (Fig. 1A). The NasR fusion construct showed a  $\text{NO}_3^-$ -triggered increase in energy transfer between donor emission at 530 nm (DxAm) and acceptor emission at 488 nm (DxDm). The NasR FRET biosensor was named NitraMeter1.0 (NiMet1.0) and reports nitrate levels with a positive ratio change ( $\Delta\text{DxAm}/\text{DxDm}$ ) (Fig. S2). Fluorescent protein pair variants and different lengths of linkers can have dramatic effects on sensor responses (21-23). In attempts to optimize NiMet1.0, different FRET pairs including brightness variants and truncation variants and different lengths of linkers to either the N- or C-terminus of the Gateway Destination vector [pDR-FLIP30, pDR-FLIP39, and pDR-FLIP42-linker (20)] were tested. NiMet2.0 (Fig. S3), a FRET pair variant containing Citrine and mCerulean, was consistently  $\text{NO}_3^-$  responsive. NasR with L12 linkers showed a larger  $\text{NO}_3^-$ -triggered response when fused to the Citrine/mCerulean pair (Fig. S3). Furthermore, RasR with no L12 linkers sandwiched by Aphrodite.t9 and mCerulean (pDR-FLIP30) yielded the highest ratio change and the lowest FRET initiation ratio (NiMet3.0; Fig. 1B). With the information of the crystal structure of NasR (17) and our observed DxAm/DxDm values

for NiMet3.0 (hereafter referred to as NiMet3.0 emission ratio) with and without  $\text{NO}_3^-$  (Fig. 1C), one hypothesis is that NiMet3.0 switches from a low FRET to high FRET average state upon binding to  $\text{NO}_3^-$ .

To test the specificity of NiMet3.0 to  $\text{NO}_3^-$ , different forms of nitrogen and other anions were examined. Neither other anions nor other nitrogen forms, like ammonium or a peptide, triggered emission ratio changes, thus the NiMet3.0 sensor is specific to  $\text{NO}_3^-$  (Fig. 1D). To determine the dynamic range of  $\text{NO}_3^-$  detection by NiMet3.0, we measured the dissociation constant ( $K_d$ ) of purified NiMet3.0 *in vitro* by tracking dose-dependent changes in NiMet3.0 emission ratios for  $\text{NO}_3^-$  (Fig. 2A). The sensitivity of NasR for  $\text{NO}_3^-$  is in the micromolar to millimolar range (19). The  $K_d$  of NiMet3.0 was  $\sim 90 \mu\text{M}$  for  $\text{NO}_3^-$  and reach a maximum at  $\text{NO}_3^-$  concentrations above 1 mM (Fig. 2B). This affinity is comparable with the NasR sensitivity for  $\text{NO}_3^-$ . Non-responsive variants of NiMet3.0, an important control of NiMet3.0 specificity, were generated via mutation of NasR residues involved in  $\text{NO}_3^-$  binding (Fig. 2B). NiMet3.0-R49A, -R50A, -R176A, and -R236A carry alanine substitutions in the predicted  $\text{NO}_3^-$  binding pocket of NasR based on the crystal structure of the NasR protein and that have been shown to disrupt  $\text{NO}_3^-$  responses (17). NiMet3.0-R49A and -R236A still showed detectable response to  $\text{NO}_3^-$ , but with lower emission ratios compared with NiMet3.0, whereas NiMet3.0-R50A and -R176A, the substitution in the NasR binding pocket, showed no responses to  $\text{NO}_3^-$ , likely due to disrupted salt-bridges that function in the interaction with  $\text{NO}_3^-$  (Fig. 2C) (17). The above mutant biosensors are evidently non-responsive to  $\text{NO}_3^-$  and, carry a nitrate binding pocket that is predicted to be non-responsive *in planta* with endogenous  $\text{NO}_3^-$ . Together, these data strongly support the hypothesis that NiMet3.0 specifically measures  $\text{NO}_3^-$  concentrations and can report dynamics of changes in  $\text{NO}_3^-$  levels.

To test specificity of the NiMet3.0 response to  $\text{NO}_3^-$  *in planta*, stable transgenic *Arabidopsis* lines expressing either NiMet3.0 or the non-responsive control NiMet3.0-R176A (under the control of the strong constitutive CaMV35S) were generated. Transgenic lines expressing NiMet3.0, but not NiMet3.0-R176A, showed significant emission ratio changes to  $\text{NO}_3^-$  in roots (Fig. 2D; quantification in Fig. 2E), indicating that NiMet3.0 can specifically detect  $\text{NO}_3^-$  in plants.

A sensor targeted to the nucleus allows the analysis of  $\text{NO}_3^-$  accumulation in the compartment most relevant to endogenous  $\text{NO}_3^-$  perception and facilitates the comparison of nlsNiMet3.0 emission ratios between nearby cells. To assess the control

of  $\text{NO}_3^-$  distribution *in planta*, we generated stable transgenic *Arabidopsis* lines expressing a nuclear-targeted variant of NiMet3.0 (nlsNiMet3.0) under the control of a promoter fragment previously shown to direct broad expression [p16 (24)]. Purified nlsNiMet3.0 showed similar *in vitro* responses to  $\text{NO}_3^-$  as NiMet3.0 (Fig. S4). Expression of nlsNiMet3.0 did not result in detectable phenotypic changes in seedlings or plants (Fig. S5). Through recording the emission ratios of primary root cells exposed to  $\text{NO}_3^-$  pulses, nlsNiMet3.0 showed a rapid response to  $\text{NO}_3^-$  pulses, and its signal was reversible when  $\text{NO}_3^-$  withheld (Fig. 3A). In roots, the  $K_d$  of nlsNiMet3.0 was  $\sim 130 \mu\text{M}$  for  $\text{NO}_3^-$  (Fig. 3B and Fig. S6). This affinity is comparable with the NiMet3.0 affinity for  $\text{NO}_3^-$  *in vitro*.

To explore if NiMet3.0 is suitable for measuring  $\text{NO}_3^-$  distribution in plants, we investigated nlsNiMet3.0 emission ratios in roots of wild type Col-0, a nitrate transporter mutant [*npf6.3/NTR1;1/chl1-5*, (25)], and a nitrate reductase mutant [*nia1nia2*, (26)] seedlings were grown on agar plates and exposed to long days (16 h light/8 h dark) for five days (Fig. 3C).  $\text{NO}_3^-$  uptake into root cells requires nitrate transporters (25). In wild-type roots, we observed an overall higher emission ratio in seedlings grown on  $\text{NO}_3^-$ -containing agar compared with those grown without  $\text{NO}_3^-$ . There was an apparent gradient of  $\text{NO}_3^-$  in the root tip, with high nlsNiMet3.0 emission ratios in the apical meristem zone that reduced to lower nlsNiMet3.0 emission ratios in the root transition zone (Fig. 3C), although local variation was observed. As expected, the nitrate transporter *npf6.3* mutant plants showed lower nlsNiMet3.0 emission ratios in all root zones with or without  $\text{NO}_3^-$  in the media compared to wild type, supporting the idea that NPF6.3 functions as a major nitrate transporter bringing external  $\text{NO}_3^-$  into roots. Furthermore, there was an overall increase of nlsNiMet3.0 emission ratios with  $\text{NO}_3^-$  treatment in the root of the *nia1nia2* mutant compared to wild type and, interestingly, higher nlsNiMet3.0 emission ratios in the cortical cells of the transition zone (Fig. 3C), suggesting an area of higher NIA1/NIA2 protein or activity levels in root. Our findings support the idea that nlsNiMet3.0 is potentially suitable for measuring  $\text{NO}_3^-$  distribution *in planta*. Corresponding quantification results of Fig. 3C are shown in Fig. 3D.

To explore which tissue(s) or zone(s) along the root are responsible for  $\text{NO}_3^-$  uptake, we analyzed nlsNiMet3.0 emission ratios in roots of *Arabidopsis* seedlings before and 30 minutes after treatment with exogenous  $\text{NO}_3^-$ . Similar to endogenous  $\text{NO}_3^-$  treatment shown in Fig. 3C, overall higher nlsNiMet3.0 emission ratios were observed in root

meristem and transition zones with exogenously applied  $\text{NO}_3^-$  (Fig. 4A), although the differential nlsNiMet3.0 emission ratios across the root could result from differential depletion activity. Treatment of Arabidopsis roots did not increase nlsNiMet3.0 emission ratios in endodermis cells, whereas exogenous  $\text{NO}_3^-$  triggered increased nlsNiMet3.0 emission ratios in epidermis, pericycle, and stele cells, as well as the highest ratios in cortex cells (Fig. 4B). After washing out the exogenous  $\text{NO}_3^-$ , the increased nlsNiMet3.0 emission ratio was rapidly reduced in all root cells. Only the cortex cells in the root meristem maintained relatively high levels after wash-out (Fig. 4A, B). It should be noted that after accumulation of exogenous  $\text{NO}_3^-$ , nlsNiMet3.0 was able to report the depletion of  $\text{NO}_3^-$  from all types of cells of the roots (Fig. 3A and 4A-B).

The accumulation of exogenously applied  $\text{NO}_3^-$ , detected by nlsNiMet3.0 in the nuclei of root cells, reflects a balance between import and depletion activities, for example metabolism, export, and compartmentation. To quantify this cooperative activity with high spatio-temporal resolution, we performed time-course experiments on Arabidopsis roots using light-sheet microscopy, a microfluidic device that allows imaging of roots growing in Fluorinated Ethylene Propylene (FEP) tubes with a perfusion control system (Fig. S7). After 90 minutes of perfusion with 10  $\mu\text{M}$  of  $\text{NO}_3^-$ , the nlsNiMet3.0 emission ratio reached its  $V_{\text{max}}$ , indicating that the concentration of  $\text{NO}_3^-$  accumulation in roots was around 250  $\mu\text{M}$ , reflective of the  $K_d$  of nlsNiMet3.0 we obtained in Arabidopsis root (Fig. 3B). With washout, the emission ratio rapidly reduced back to initial levels (Fig. 4C-D and Movie S1). These results also indicated that the import and depletion activities were dynamically balanced in root after 90 min of perfusion with 10  $\mu\text{M}$  of  $\text{NO}_3^-$ .

Here we report the engineering and analysis of the first biosensor for nitrate ( $\text{NO}_3^-$ ) in *planta* and its use to examine the  $\text{NO}_3^-$  distribution in whole root tissues (Fig. S8). The biosensor nlsNiMet3.0 can be used in living plant roots to quantify  $\text{NO}_3^-$  concentrations and dynamics.

## References and Notes

1. C. Masclaux-Daubresse *et al.*, Nitrogen uptake, assimilation and remobilization in plants: challenges for sustainable and productive agriculture. *Ann. Bot.* **105**, 1141-1157 (2010).

2. N. M. Crawford, B. G. Forde, Molecular and developmental biology of inorganic nitrogen nutrition. *The arabidopsis book* **1**, e0011-e0011 (2002).
3. A. J. Karley, R. A. Leigh, D. Sanders, Where do all the ions go? The cellular basis of differential ion accumulation in leaf cells. *Trends Plant Sci.* **5**, 465-470 (2000).
4. R. G. Zhen, H. W. Koyro, R. A. Leigh, A. D. Tomos, A. J. Miller, Compartmental nitrate concentrations in barley root cells measured with nitrate-selective microelectrodes and by single-cell sap sampling. *Planta* **185**, 356-361 (1991).
5. H. Zhang, A. Jennings, P. W. Barlow, B. G. Forde, Dual pathways for regulation of root branching by nitrate. *Proc. Natl. Acad. Sci. USA* **96**, 6529-6534 (1999).
6. P. M. Palenchar, A. Kouranov, L. V. Lejay, G. M. Coruzzi, Genome-wide patterns of carbon and nitrogen regulation of gene expression validate the combined carbon and nitrogen (CN)-signaling hypothesis in plants. *Genome Biol* **5**, (2004).
7. M. Stitt, Nitrate regulation of metabolism and growth. *Curr. Opin. Plant Biol.* **2**, 178-186 (1999).
8. D. T. Clarkson *et al.*, Nitrate and ammonium influxes in soybean (*Glycine max*) roots: Direct comparison of  $^{13}\text{N}$  and  $^{15}\text{N}$  tracing. *Plant Cell Envir.* **19**, 859-868 (1996).
9. M. Y. Wang, M. Y. Siddiqi, T. J. Ruth, A. Glass, Ammonium uptake by rice roots (II. kinetics of  $^{13}\text{NH}_4^+$  influx across the plasmalemma). *Plant Physiol.* **103**, 1259-1267 (1993).
10. I. Guevara *et al.*, Determination of nitrite/nitrate in human biological material by the simple Griess reaction. *Clin. Chim. Acta.* **274**, 177-188 (1998).
11. G. H. Henriksen, A. J. Bloom, R. M. Spanswick, Measurement of net fluxes of ammonium and nitrate at the surface of barley roots using ion-selective microelectrodes. *Plant Physiol.* **93**, 271-280 (1990).
12. G. H. Henriksen, D. R. Raman, L. P. Walker, R. M. Spanswick, Measurement of Net Fluxes of Ammonium and Nitrate at the Surface of Barley Roots Using Ion-Selective Microelectrodes : II. Patterns of Uptake Along the Root Axis and Evaluation of the Microelectrode Flux Estimation Technique. *Plant Physiol.* **99**, 734-747 (1992).

13. S. Kiyomiya *et al.*, Real time visualization of  $^{13}\text{N}$ -translocation in rice under different environmental conditions using positron emitting tracer imaging system. *Plant Physiol.* **125**, 1743-1753 (2001).
14. H. Matsunami *et al.*,  $^{13}\text{N}$ -nitrate uptake sites and rhizobium-infectible region in a single root of common bean and soybean. *Soil Science and Plant Nutrition* **45**, 955-962 (1999).
15. P. L. Clode *et al.*, *In situ* mapping of nutrient uptake in the rhizosphere using nanoscale secondary ion mass spectrometry. *Plant Physiol.* **151**, 1751-1757 (2009).
16. S. Okumoto, A. Jones, W. B. Frommer, Quantitative imaging with fluorescent biosensors. *Annu. Rev. Plant Biol.* **63**, 663-706 (2012).
17. M. Boudes *et al.*, The structure of the NasR transcription antiterminator reveals a one-component system with a NIT nitrate receptor coupled to an ANTAR RNA-binding effector. *Mol. Microbiol.* **85**, 431-444 (2012).
18. W. H. Chai, V. Stewart, NasR, a novel RNA-binding protein, mediates nitrate-responsive transcription antitermination of the *Klebsiella oxytoca* M5al nasF operon leader in vitro. *J. Mol. Biol.* **283**, 339-351 (1998).
19. J. R. Goodson *et al.*, An autoinhibitory mechanism controls RNA-binding activity of the nitrate-sensing protein NasR. *Mol. Microbiol.* **114**, 348-360 (2020).
20. A. M. Jones *et al.*, Abscisic acid dynamics in roots detected with genetically encoded FRET sensors. *eLife* **3**, e01741 (2014).
21. K. Deuschle *et al.*, Construction and optimization of a family of genetically encoded metabolite sensors by semirational protein engineering. *Protein Sci.* **14**, 2304-2314 (2005).
22. S. A. Hires, Y. Zhu, R. Y. Tsien, Optical measurement of synaptic glutamate spillover and reuptake by linker optimized glutamate-sensitive fluorescent reporters. *Proc. Natl. Acad. Sci. USA* **105**, 4411-4416 (2008).
23. H. Takanaga, B. Chaudhuri, W. B. Frommer, GLUT1 and GLUT9 as major contributors to glucose influx in HepG2 cells identified by a high sensitivity intramolecular FRET glucose sensor. *Biochim. Biophys. Acta.* **1778**, 1091-1099 (2008).
24. C. Schuster *et al.*, A Regulatory Framework for Shoot Stem Cell Control Integrating Metabolic, Transcriptional, and Phytohormone Signals. *Dev. Cell* **28**, 438-449 (2014).



25. S. Leran *et al.*, A unified nomenclature of NITRATE TRANSPORTER 1/PEPTIDE TRANSPORTER family members in plants. *Trends Plant Sci.* **19**, 5-9 (2014).
26. R. Desikan, R. Griffiths, J. Hancock, S. Neill, A new role for an old enzyme: Nitrate reductase-mediated nitric oxide generation is required for abscisic acid-induced stomatal closure in *Arabidopsis thaliana*. *Proc. Natl. Acad. Sci. USA* **99**, 16314-16318 (2002).
27. A. M. Jones *et al.*, In vivo biochemistry: applications for small molecule biosensors in plant biology. *Curr. Opin. Plant Biol.* **16**, 389-395 (2013).
28. K. Deuschle *et al.*, Rapid metabolism of glucose detected with FRET glucose nanosensors in epidermal cells and intact roots of *Arabidopsis* RNA-silencing mutants. *Plant Cell* **18**, 2314-2325 (2006).
29. M. A. Rizzo, G. Springer, K. Segawa, W. R. Zipfel, D. W. Piston, Optimization of pairings and detection conditions for measurement of FRET between cyan and yellow fluorescent proteins. *Microsc Microanal* **12**, 238-254 (2006).
30. E. W. Jones, Tackling the protease problem in *Saccharomyces cerevisiae*. *Methods Enzymol* **194**, 428-453 (1991).
31. D. Gietz, A. St. Jean, R. A. Woods, R. H. Schiestl, Improved method for high efficiency transformation of intact yeast cells. *Nucl. Acids Res.* **20**, 1425 (1992).
32. C. Bermejo, F. Haerizadeh, H. Takanaga, D. Chermak, W. B. Frommer, Dynamic analysis of cytosolic glucose and ATP levels in yeast using optical sensors. *Biochem. J.* **432**, 399-406 (2010).
33. C. Bermejo, F. Haerizadeh, H. Takanaga, D. Chermak, W. B. Frommer, Optical sensors for measuring dynamic changes of cytosolic metabolite levels in yeast. *Nat. Protoc.* **6**, 1806-1817 (2011).
34. M. J. Battraw, T. C. Hall, Histochemical Analysis of Camv 35s Promoter-Beta-Glucuronidase Gene-Expression in Transgenic Rice Plants. *Plant Mol. Biol.* **15**, 527-538 (1990).
35. A. Rekas, J. R. Alattia, T. Nagai, A. Miyawaki, M. Ikura, Crystal structure of venus, a yellow fluorescent protein with improved maturation and reduced environmental sensitivity. *J. Biol. Chem.* **277**, 50573-50578 (2002).
36. M. Lelimosin *et al.*, Intrinsic Dynamics in ECFP and Cerulean Control Fluorescence Quantum Yield. *Biochemistry* **48**, 10038-10046 (2009).

**Acknowledgments:** We gratefully acknowledge Dr. Wolf B. Frommer for discussions and suggestions. We thank Addgene for distributing plasmids donated by Wolf B. Frommer. We thank the Advanced Optics Microscope Core Facility at Academia Sinica for technical support for fluorescence imaging. The core facility is funded by Academia Sinica Core Facility and Innovative Instrument Project (AS-CFII-108-116). We thank Anita K. Snyder for English editing.

**Funding:** This research was supported by Academia Sinica, Taiwan, and the Ministry of Science and Technology, Taiwan, Grants MOST 105-2311-B-001-045 and 106-2311-B-001-037-MY3.

**Author contributions:**

Conceptualization: C.-H.H.

Methodology: C.-H.H., Y.-N.C., H.N.C.

Investigation: C.-H.H., Y.-N.C., H.N.C.

Writing, C.-H.H.

Supervision, C.-H.H.

**Competing interests:** The authors declare that they have no conflict of interest.

**Data and materials availability:** All data are available in the manuscript or the supplementary materials. Correspondence and requests for materials should be addressed to C.-H.H.

**Supplementary Materials**

Materials and Methods

Supplementary Text

Figs. S1 to S8

References (17, 20, 24, 27–34)

## Movie S1

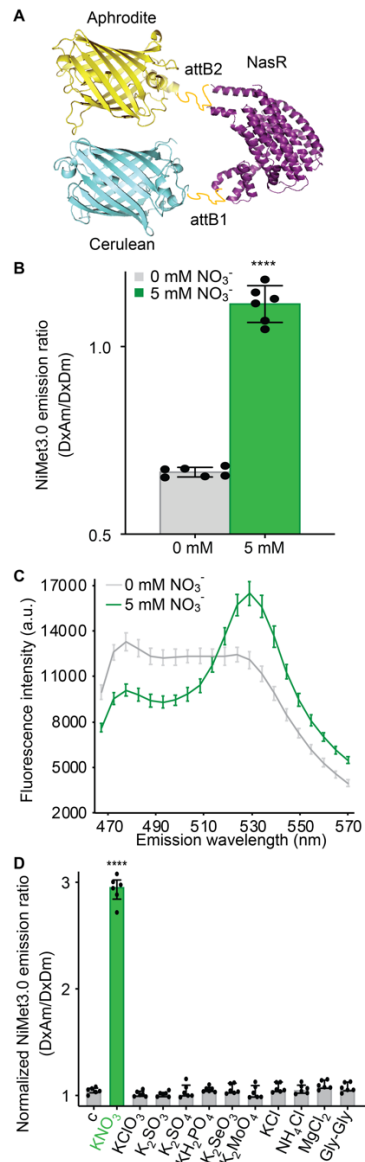

**Fig. 1. Engineering and specificity for NO<sub>3</sub><sup>-</sup> of nitrate biosensor-NiMet 3.0.** **A**, Structural model of NiMet 3.0 bound to NO<sub>3</sub><sup>-</sup>. NasR, an NO<sub>3</sub><sup>-</sup> binding protein, was fused via *attB1* and *attB2* linkers to a fluorescent protein FRET pair (donor, Aphrodite, and acceptor, Cerulean). The NasR protein (purple) representation is from a published structure of NasR [PDB 4AKK(17)]. The Aphrodite (yellow) representation is from a published structure of Venus [PDB 1MYW(35)] and the Cerulean (blue) representation is from a published structure of Cerulean [PDB 2WSO(36)]. **B and C**, Fluorescence emission ratio at 530 nm (B) and emission wavelength scan (C) of purified NiMet3.0 protein with and without NO<sub>3</sub><sup>-</sup>. Nitrate concentration as indicated in figures. **D**, Substrate specificity of purified NiMet3.0 treated with the indicated compounds at 5 mM concentrations. Only nitrate triggered responses that were significantly different from control, c (\*, *p* < 0.0001, *t*-test). The

presented data are Mean  $\pm$  s.d. of six biological repeats. Experiment performed as in Fig. 1B.

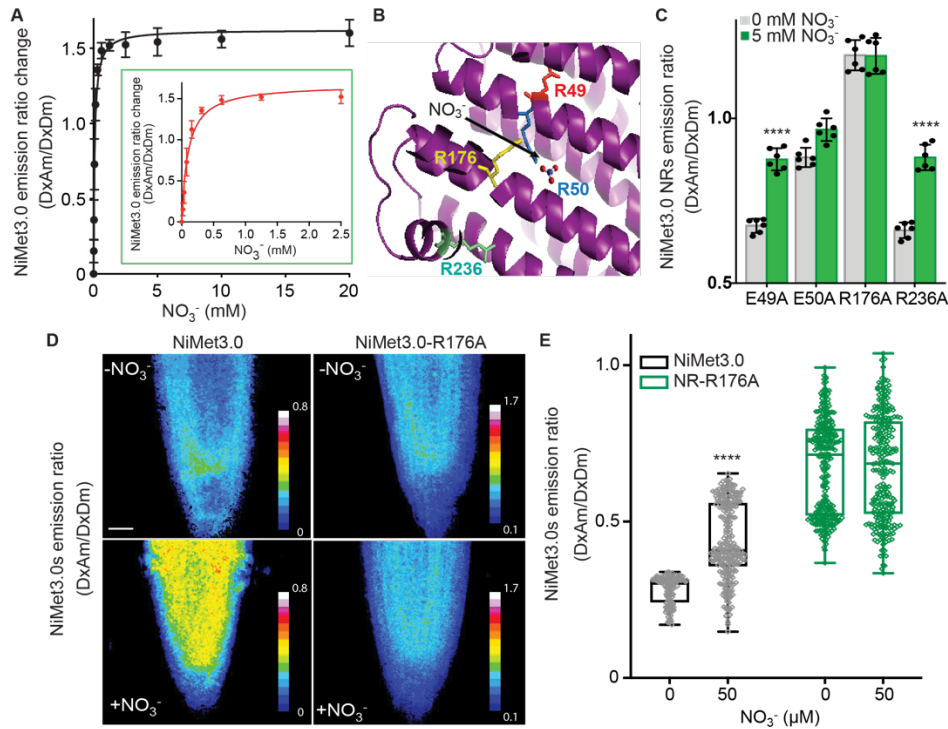

**Fig. 2. Fluorescence emission ratio response of purified NiMet3.0 to  $\text{NO}_3^-$  *in vitro* and *in vivo*.** **A**, NiMet3.0 fluorescence response to increasing concentrations of  $\text{NO}_3^-$ . Inset: Enlargement of the NiMet3.0 fluorescence response from 0 to 2.5 mM  $\text{NO}_3^-$ . **B**, NiMet3.0 residues of the nitrate binding pocket of NasR mutagenized to make NitMet3.0 non-responsive constructs (NiMet3.0 NR). Four residues of NasR, R49, R50, R176, and R236 (red, blue, yellow and green, respectively) were mutagenized to Ala. **C**, Fluorescence emission ratios of purified NiMet3.0-NR proteins with and without  $\text{NO}_3^-$  treatment. Nitrate concentration as indicated in figures. Student's *t*-test \*\*\*\**P* value < 0.0001. Mean and s.d. of six biological repeats are presented. **D**, Images of NiMet3.0 and NiMet3.0 NR-R176A emission ratios in 6-day-old roots in transgenic Col-0 grown with or without 5 mM  $\text{NO}_3^-$ . **E**, Corresponding quantitative analysis of NiMet3.0s emission ratios of root in D. Beeswarm box plot of NiMet3.0s emission ratios from root region ( $n > 80$  areas from three independent seedlings for each genotype of three biological experiments). Student's *t*-test \*\*\*\**P* value < 0.0001. NiMet3.0 emission ratios were statistically different compared to no nitrate.

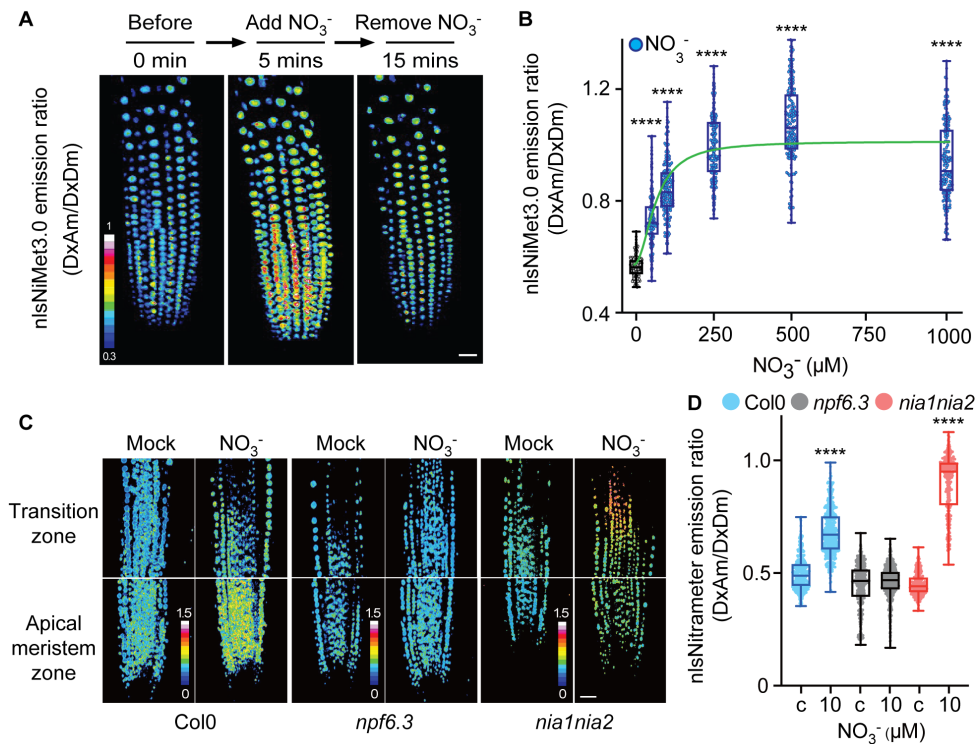

**Fig. 3. Emission ratios of nlsNiMet3.0 in root tips before and after  $\text{NO}_3^-$  treatment in Arabidopsis roots.** **A**, Three-dimensional images of nlsNiMet3.0 emission ratios of 5-day-old roots in transgenic Col-0 before an  $\text{NO}_3^-$  pulse, after the  $\text{NO}_3^-$  pulse, and after removing the  $\text{NO}_3^-$ . 50  $\mu\text{M}$  of  $\text{NO}_3^-$  was used. **B**, Beeswarm and box plot of  $\text{NO}_3^-$  concentration-dependent nlsNiMet3.0 emission ratios for nuclei of root tips from Fig. S6. Green line indicates as nonlin fit of nlsNiMet3.0  $K_d$  curve. Student's  $t$ -test \*\*\*\* $P$  value  $< 0.0001$ . Mean and s.d. of three biological repeats are presented. **C**, Images of nlsNiMet3.0 emission ratios of 6-day-old root zones (meristem and transition zone) in FRET transgenics in wild-type Col-0, *npf6.3*, and *nia1nia2* backgrounds grown with or without  $\text{NO}_3^-$ . **D**, Corresponding quantitative analysis of nlsNiMet3.0 emission ratios of root in C. Beeswarm and box plot of nlsNiMet3.0 emission ratios for nuclei of central region ( $n > 180$  nuclei from three independent seedlings for each genotype of three biological experiments). nlsNiMet3.0 emission ratios were statistically different in *npf6.3* and *nia1nia2* compared to Col-0 backgrounds (c, as mock as control). \*\*\*\* $P$  value  $< 0.0001$ .

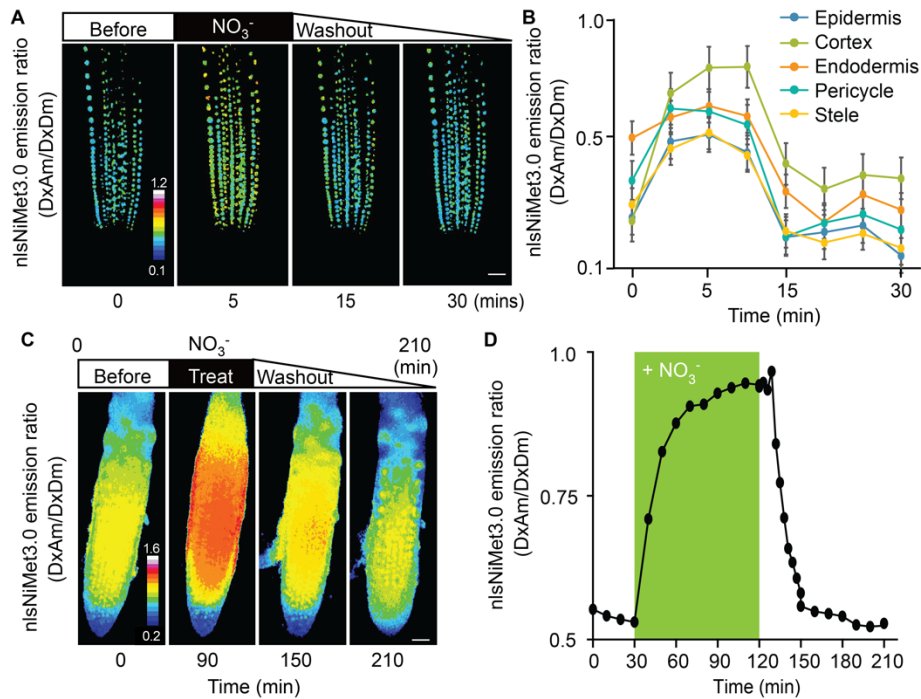

**Fig. 4. Emission ratios of nlsNiMet3.0 in root under time-course treatment of  $\text{NO}_3^-$ .** **A** and **B**, Images and corresponding quantitative analysis of Arabidopsis root before and after  $\text{NO}_3^-$  treatment. Images obtained after incubation with  $50 \mu\text{M}$   $\text{NO}_3^-$  for 5 min. Images were taken before or immediately after  $\text{NO}_3^-$  treatment for 5 mins, or during the washout at 15 and 30 mins. Scale bar,  $25 \mu\text{m}$ . **B**, Quantitative analysis of nlsNiMet3.0 emission ratios for nuclei of epidermis, endodermis, cortex, pericycle, and stele cells in roots from **A**. Complete experiments were repeated at least three times with similar results. **C**, Time-course treatment of nlsNiMet3.0 with  $\text{NO}_3^-$ . Images were taken before or immediately after  $\text{NO}_3^-$  treatment for 90 min or at 150 min and 210 min, during the washout. Scale bar,  $25 \mu\text{m}$ . **D**, Corresponding quantitative analysis of nlsNiMet3.0 emission ratios of root in **C**. Complete experiments were repeated at least three times with similar results.

# Supplementary Materials for

In vivo visualization of nitrate dynamics using a genetically encoded biosensor

Yen-Ning Chen, Heather Cartwright, and Cheng-Hsun Ho.

Correspondence to: [zcybele3@sinica.edu.tw](mailto:zcybele3@sinica.edu.tw)

## **This PDF file includes:**

Materials and Methods  
Supplementary Text  
Figs. S1 to S8  
Caption for Movie S1

## **Other Supplementary Materials for this manuscript include the following:**

Movie S1



## Materials and Methods

### DNA Constructs

The construction of the sensor expression vector has been described (27). Constructs were inserted by Gateway LR reactions, into the yeast expression vectors pDR-Flip30, 39, 42-linkers and -GW. The vector of pDR-Flip30 sandwiches the insert between an N-terminal Aphrodite t9 (AFPt9) variant (28), with 9 amino acids truncated off the C-terminus, and a C-terminal monomeric Cerulean (mCer) (3). pDR-Flip39 sandwiches the inserted polypeptide between an N-terminal enhanced dimer Aphrodite t9 (edAFPt9) and C-terminal fluorescent protein enhanced dimer, with 7 amino acids and 9 amino acids truncated from the N-terminus and C-terminus of eCyan (t7.ed.eCFPt9), respectively. pDRFlip42-linker carries an N-terminal citrine and a C-terminal mCerulean (29). The pDR-Flip42-linker vector was digested with *KpnI* (NEB) for insertion of additional linker sequences (Arg-Ser-Arg-Pro-Thr-Arg-Pro-Gly-Glu-Leu-Gly-Thr) to generate pDRFlip42-linker vector. The full-length ORF of NasR, the NIT domain of NasR, or NasR carrying point mutations from *Klebsiella oxytoca* (17) in the pDONR221 GATEWAY™ Entry vector were used as sensory domains for creating the nitrate sensors NiMet-NIT, NiMet1.0, NiMet2.0, NiMet3.0, nlsNiMet3.0, or NiMet3.0-NRs. The yeast expression vectors were then created by GATEWAY™ LR reactions between different forms of pDONR221-NasR/NIT and different pDR-FLIP-GWs, following manufacturer's instructions.

### Generation of NiMet3.0-NR mutants

The nitrate binding domain of the NasR Entry Clone for NiMet3.0 was altered using the QuikChange Lightning Site-Directed Mutagenesis Kit (Agilent Technologies) according to manufacturer's instructions to generate the NiMet3.0-NR mutations. Primers for site-directed mutagenesis of NiMet3.0 to create NiMet3.0-NR are as followed: R49A, Forward: 5'-catatgctgcagtgtgcacggggagccagtaaat-3', Reverse: 5'-attactggctcccgtgcacactgcagcatatg-3'; R50A, Forward: 5'-gtacatatgctgcagtgtgaagcggggagccagtaaatctg-3', Reverse: 5'-cagatattactggctcccgttcacactgcagcatatgtac-3'; R176A, Forward: 5'-cgcggggtcaggcagcggggcgctgg-3', Reverse: 5'-ccagcggcctgctgacctgaccgcg-3'; R236A, Forward: 5'-gagattgagcagctggctcgtgctgctgacac-3', Reverse: 5'-gtgcaagcgacacgagccagctgctcaatctc-3'.

### Expression of sensors in yeast

*Saccharomyces cerevisiae* strain BJ5465 [ATCC 208289 (*MATa ura3-52 trp1 leu2-Δ1 his3-Δ200 pep4::HIS3 prb1-Δ1.6 R can1 GAL*) (30), obtained from the Yeast Genetic Stock Center (University of California, Berkeley, CA), was transformed with the pDRFlips yeast expression plasmids using a lithium acetate transformation protocol (31). Transformed yeast were selected on solid YNB (minimal yeast medium without nitrogen; Difco) supplemented with 2% glucose and –*ura* DropOut medium (Clontech). Single colonies were grown in 5 mL liquid YNB supplemented with 2% glucose and –*ura* drop out under agitation (230 rpm) at 28 °C until OD<sub>600nm</sub> ~ 0.8 was reached for fluorescence analysis of sensor expression and for metal-affinity chromatography purification of sensors. Yeast strains expressing sensors were grown in 30-ml cultures in –*ura* DropOut medium in 50-ml culture tubes.

### Fluorescence analysis of purified sensors

Biosensors were purified by metal affinity chromatography. Yeast lysates were diluted 1:2 in 50 mM MOPS, 10 mM imidazole, pH 7.4 and then filtered through a 0.45-μm PES filter and bound to Poly-Prep chromatography columns (Bio-Rad) containing His-Pur Cobalt resin (Bio-Rad).

Columns were then washed twice with 50 mM MOPS, 10 mM imidazole, pH 7.4 and eluted in 50 mM MOPS, 150 mM imidazole, pH 7.4. Samples were diluted in 50 mM MOPS, pH 7.4. Fluorescence was measured in a fluorescence plate reader (M1000, TECAN, Austria), in bottom-reading mode using a 7.5 nm bandwidth for both excitation and emission (32, 33). Typically, emission spectra were recorded ( $\lambda_{em}$  470-570 nm, step size, 5 nm). To quantify fluorescence responses of the sensors to substrate addition, 100  $\mu$ L of substrate (dissolved in 50 mM MOPS buffer, pH 7.4) were added to 100  $\mu$ L of cells in 96-well flat bottom plates (#655101; Greiner, Monroe, NC). Fluorescence from pDRFlip30 (donor: mCER), 39 (donor: t7.ed.eCFPt9), and 42-linker (donor: mCerulean) was measured by excitation at  $\lambda_{exc}$  428 nm. Determination of the apparent  $K_d$  of NiMet3.0 for nitrate was performed as described previously (17). The purified NiMet3.0 protein was pretreated with 0- 20 mM nitrate. Data are reported as mean and s.d. of 3–4 replicates, and each experiment was performed at least three times with similar results. After 15 minutes, buffer was exchanged to 50 mM MOPS, pH 7.4, and fluorescence was analyzed. The emission ratio was subsequently calculated dividing the value of the 530 nm by 488 nm range.

#### Expression of NiMet3.0, NiMet3.0-NR-R176A, and nlsNiMet3.0 in Arabidopsis

The p16 promoter (24) from the AT3G60245 gene encoding a 16 S ribosomal subunit was used to drive the nuclear-localized NiMet3.0 fusion biosensor, whereas the CaMV 35S promoter (34) was used to drive the NiMet3.0 and NiMet3.0-NR-R176A fusion biosensor in plants. The following construct was inserted into the multiple cloning site of the p16-Kan vector (20) : 5' – a sequence coding for the SV40-derived nuclear localization signal LQPKKRKRKVG (24), a sequence coding for Aphrodite; a Gateway cassette including *attR1*, Chloramphenicol resistance gene, *ccdB* terminator gene and *attR2*; a sequence coding for mCerulean (mCer); and a sequence coding for the cMyc epitope tag – 3', or pZPFlip *UBQ10*-KAN vector under control of the *UBQ10* promoter. The resulting Gateway Destination vectors (p16-FLIPnls30 and pZPFlip30) were then recombined in Gateway LR reactions with NasR or NasR-NR-R176A Entry Clones, resulting in NiMet3.0, NiMet3.0-NR-R176A, and nlsNiMet3.0 expression clones. Transgenic plant lines were generated using the *Agrobacterium* floral dip method as described previously (28). Transformants were selected on agar plates containing  $\frac{1}{2} \times$  Murashige Skoog (MS) medium with Kanamycin.

#### Fluorescence microscopy

*Arabidopsis* seedlings were either grown vertically on  $\frac{1}{2} \times$  MS agar medium ( $\frac{1}{2} \times$  MS salts without nitrogen, 1% Agar, 0.05% (w/v) sucrose, pH 5.7) plates or germinated on hydroponic medium solidified with 1% agar (Becton Dickinson Biosciences) within cut pipette tips, 5-mm long and 1-mm diameter, that were positioned in an upright position onto a plate with solidified medium for confocal images or light-sheet images, respectively. Plates were stratified for 3 days at 4 °C in the dark prior to being placed in a growth chamber with long-day growth conditions (16 h light/8 h dark cycling, temperature cycling 22 °C day/18 °C night, 67% RH). Seedlings for confocal images were placed in solution containing  $\frac{1}{2} \times$  MS medium ( $\frac{1}{2} \times$  MS salts without nitrogen, 0.05% sucrose pH 5.7) and prepared for imaging on glass slides. Seedlings for light-sheet microscopy were grown for 3 days in the growth chamber, at which time the root tips had almost reached the lower tip outlet. The tips were plugged into a ~3-cm piece of Fluorinated Ethylene Propylene (FEP) tubing with an inner diameter of 0.115 cm, an outer diameter of 0.195 cm, and wall thickness of 0.04 cm (TEF-CAP, AWG17SW-FEP) and sterilized in 70% ethanol. A closed cultivation system within FEP tubing was used for imaging. Both upper and lower FEP tubes were sealed using gaskets, on which an inlet and outlet tube were inserted into each side of the gaskets and connected to silicon tubing within a pumping perfusion system. To maintain the humidity

within the closed cultivation system, the inner sides of the tubing holder have surrounding water reservoirs. Upon transfer to the light-sheet microscope, the seedling was illuminated by a light connected to a timer switch to maintain the light/dark period. The FEP tubing was filled with half-strength hydroponic medium without nitrogen and incubated for 3 days. The FEP tubing was then fixed in a metal holder and placed into the light-sheet microscopic chamber, which was filled with water. The half-strength hydroponic medium without nitrogen (pH 5.5) was continually replaced using a peristaltic pump (GE HealthCare) with a flow rate of 1 mL per hour. The temperature of the microscopy chamber was set at 22 °C.

For nitrate treatments on glass slides, seedlings were placed on glass slides with 50  $\mu$ L solution and surrounded with a rectangle of vacuum grease and covered with a square cover slip equal in height and half the width of the vacuum grease rectangle. The nitrate treatment solution could then be exchanged beneath the coverslip by addition to the left and removal from the right side of the coverslip. Images were acquired at the time points as indicated in each figure.

Confocal images were acquired on a Zeiss 780 using a 20x/0.8 Plan-Apochromat dry objective or 40x/1.2 C-Apochromat water objective. Cyan fluorescent protein (CFP; 440 nm) and YFP (514 nm) were excited with lasers. Fluorescence emission was detected by a GaAsP PMT detector, set to detect 463 to 508 nm for CFP, and a normal PMT detector, set to 520 to 585 nm for YFP. The laser power was set between 0.5% and 2% with detector gain set to 700-750 to image CFP or YFP.

The lab-established light-sheet system coordinated with a *micro*LAMBDA Pte Ltd (Singapore). Light-sheet imaging was performed using a 20x 0.5 dipping objective; two illumination arms with galvanometer scanners; 10x long working distance objectives; and 445 nm and 515 nm lasers used for excitation of CFP and YFP, respectively. For FRET measurements, sequential imaging of cyan and yellow fluorescent proteins is performed with a DC filter wheel with ET470/24m and an ET535/50m emission filters, driven by a MAC6000 controller (Ludl Electronic Products, Hawthorne, NY). Fluorescence emission was detected by a Hamamatsu Flash 4.0 V3 camera. Imaging data were acquired using MetaMorph software (Downingtown, PA). Data were taken as time series with simultaneous acquisition of FRET donor and acceptor fluorophores under donor excitation, followed by acquisition of donor and acceptor under acceptor excitation.

### Image processing and analysis

Image processing and fluorescence pixel intensity were quantified using Fiji software (<http://fiji.sc/>). Mean gray values of regions of interest within the root meristem region were calculated as follows: Background was subtracted from all measured intensities as generated ROIs where there was no plant material, measured mean intensity values in all four channels (Dx/Dm; Dx/Am; Ax/Dm; Ax/Am) and subtracted that intensity from the entire image. Ratio images (DxAm/DxDm) were created using the Ratio Plus plug-in for ImageJ (Paulo Magalhães, University of Padua, Italy). Regions of interest were selected and analyzed with the help of the ROI manager tool.

In this work, we presented data using Beeswarm and box plots of raw data. In the beeswarm and box plot graphs, the central rectangle spans the first quartile to the third quartile, while the line inside the rectangle shows the median. The whiskers denote 1.5 interquartile ranges from the box and outlying values plotted beyond the whiskers. All the statistical analyses were performed using GraphPad Prism version 9.0.0 for MAC ([www.graphpad.com](http://www.graphpad.com)).

## Supplementary Text

### Reference:

17. M. Boudes *et al.*, The structure of the NasR transcription antiterminator reveals a one-component system with a NIT nitrate receptor coupled to an ANTAR RNA-binding effector. *Mol. Microbiol.* **85**, 431-444 (2012).
20. A. M. Jones *et al.*, Abscisic acid dynamics in roots detected with genetically encoded FRET sensors. *eLife* **3**, e01741 (2014).
24. C. Schuster *et al.*, A Regulatory Framework for Shoot Stem Cell Control Integrating Metabolic, Transcriptional, and Phytohormone Signals. *Dev. Cell* **28**, 438-449 (2014).
27. A. M. Jones *et al.*, In vivo biochemistry: applications for small molecule biosensors in plant biology. *Curr. Opin. Plant Biol.* **16**, 389-395 (2013).
28. K. Deuschle *et al.*, Rapid metabolism of glucose detected with FRET glucose nanosensors in epidermal cells and intact roots of *Arabidopsis* RNA-silencing mutants. *Plant Cell* **18**, 2314-2325 (2006).
29. M. A. Rizzo, G. Springer, K. Segawa, W. R. Zipfel, D. W. Piston, Optimization of pairings and detection conditions for measurement of FRET between cyan and yellow fluorescent proteins. *Microsc Microanal* **12**, 238-254 (2006).
30. E. W. Jones, Tackling the protease problem in *Saccharomyces cerevisiae*. *Methods Enzymol* **194**, 428-453 (1991).
31. D. Gietz, A. St. Jean, R. A. Woods, R. H. Schiestl, Improved method for high efficiency transformation of intact yeast cells. *Nucl. Acids Res.* **20**, 1425 (1992).
32. C. Bermejo, F. Haerizadeh, H. Takanaga, D. Chermak, W. B. Frommer, Dynamic analysis of cytosolic glucose and ATP levels in yeast using optical sensors. *Biochem. J.* **432**, 399-406 (2010).
33. C. Bermejo, F. Haerizadeh, H. Takanaga, D. Chermak, W. B. Frommer, Optical sensors for measuring dynamic changes of cytosolic metabolite levels in yeast. *Nat. Protoc.* **6**, 1806-1817 (2011).
34. M. J. Battraw, T. C. Hall, Histochemical Analysis of Camv 35s Promoter-Beta-Glucuronidase Gene-Expression in Transgenic Rice Plants. *Plant Mol. Biol.* **15**, 527-538 (1990).

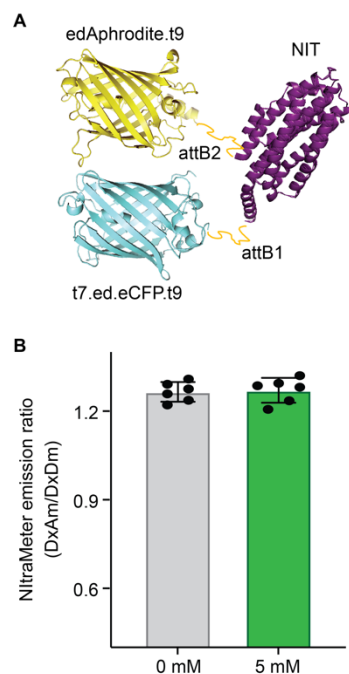

**Fig. S1. Fluorescence emission ratio of NiMet-NIT.**

**A**, Structural model of NiMet-NIT. NIT was fused via *attB1* and *attB2* linkers to fluorescent protein FRET pairs (donor, edAphrodite.t9, and acceptor, t7.ed.eCFP.t9, fluorescent proteins). The NIT protein (purple) representation is from a published structure [PDB 4AKK(17)]. **B**, Purified NiMet-NIT proteins with and without 5 mM NO<sub>3</sub><sup>-</sup> treatment. Mean and s.d. of six biological repeats are presented.

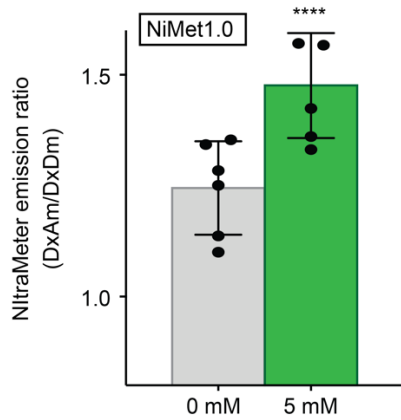

**Fig. S2. Fluorescence emission ratio of NiMet1.0.**

NasR was fused via *attB1* and *attB2* linkers to fluorescent protein FRET pairs (donor, edAphrodite.t9, and acceptor, t7.ed.eCFP.t9, fluorescent proteins). Purified NiMet1.0 proteins with and without 5 mM  $\text{NO}_3^-$  treatment. Student's *t*-test \*\*\*\* $P$  value < 0.0001. Mean and s.d. of six biological repeats are presented.

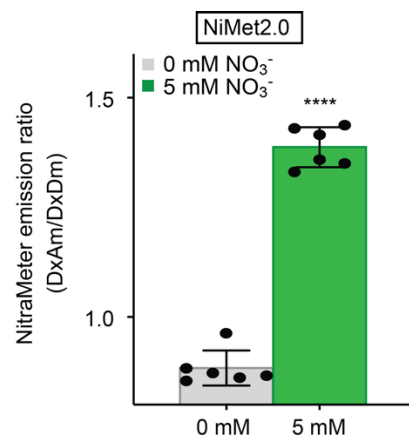

**Fig. S3. Fluorescence emission ratio of NiMet2.0.**

NasR was fused via *attB*, *attB2*, and L12 linkers to fluorescent protein FRET pairs (donor, Citrine, and acceptor, mCerulean, fluorescent proteins). Purified NiMet2.0 proteins with and without 5 mM NO<sub>3</sub><sup>-</sup> treatment. Student's *t*-test \*\*\*\**P* value < 0.0001. Mean and s.d. of six biological repeats are presented.

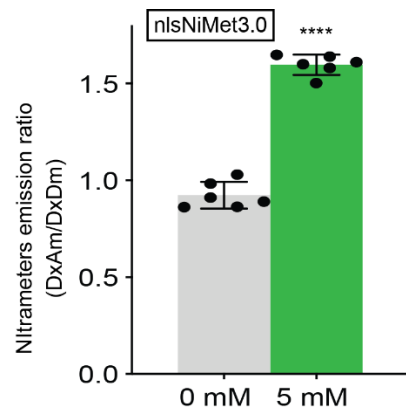

**Fig. S4. Fluorescence emission ratio of nlsNiMet3.0.**

Purified nlsNiMet3.0 proteins with and without 5 mM  $\text{NO}_3^-$  treatment. Student's *t*-test \*\*\*\**P* value < 0.0001. Mean and s.d. of six biological repeats are presented.



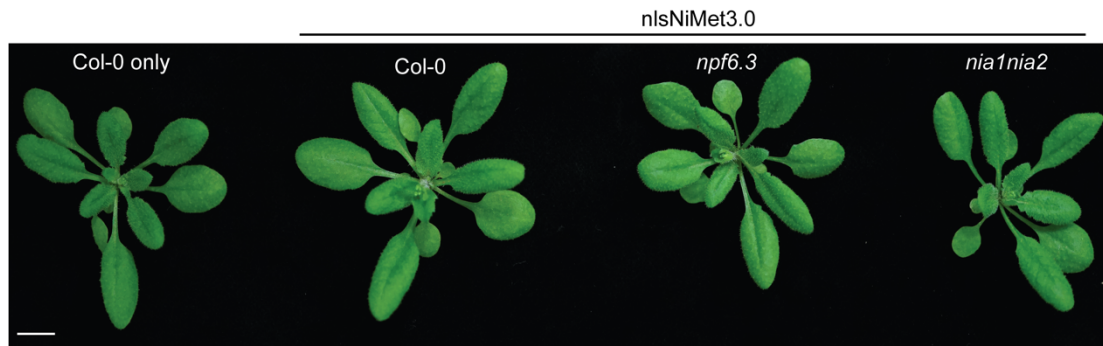

**Fig. S5. Seedlings of Col-0 and mutants expressing nlsNiMet3.0.**

No significant growth phenotype was observed in plants expressing nlsNiMet3.0 in Col-0, *npf6.3* or *nia1nia2* backgrounds plants when compare with wild type Col-0. Pictures were taken while plants were grown under full nutrient conditions, day/night cycles 16/8 hours for 14 days. Scale bar, 1 cm.

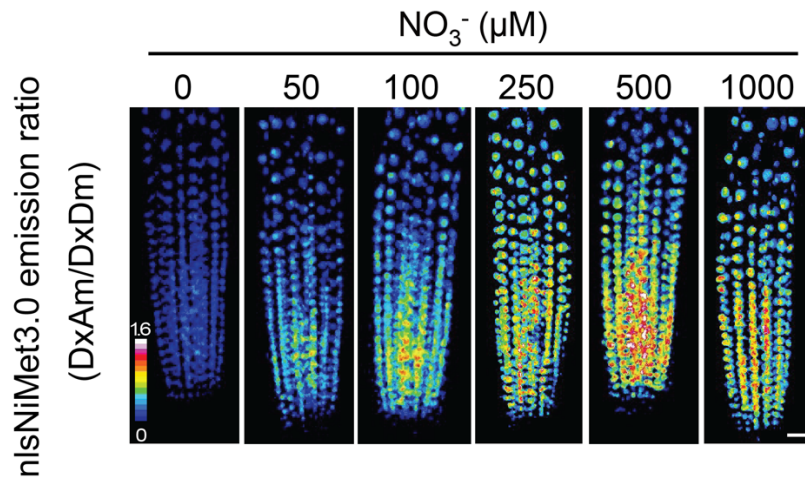

**Fig. S6. S6 nlsNiMet3.0 fluorescence response to increasing concentrations of  $\text{NO}_3^-$  in root.** Three-dimensional images of nlsNiMet3.0 emission ratios in 6-day-old roots in Col-0 background. The concentrations of  $\text{NO}_3^-$  are indicated in figure. Scale bar, 25  $\mu\text{m}$ . Complete experiments were repeated at least three times with similar results.

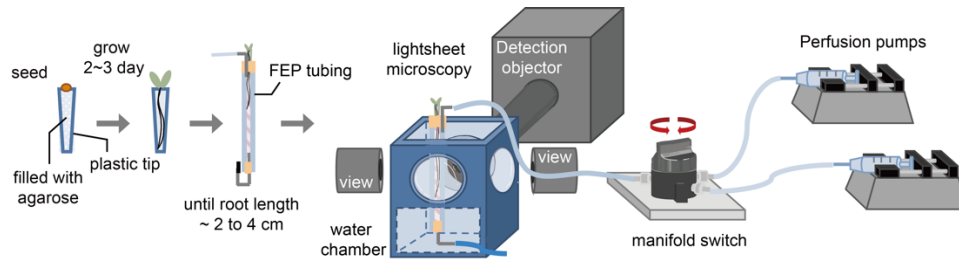

**Fig. S7. Workflow for imaging Arabidopsis root in light-sheet microscope with perfusion system.**

Sample workflow for *in vivo* microscopic imaging in lab-designed light-sheet apparatus. *Arabidopsis* seeds are germinated on top of nutrient agarose solidified in a plastic tip. Plastic tips are placed on one end of a piece of FEP tubing, where the root tip is subjected to liquid flow and becomes accessible for imaging. An optional valving system provides precise control over the flow during experiments where conditions need to be changed rapidly. Imaging then occurs on a light-sheet microscope.

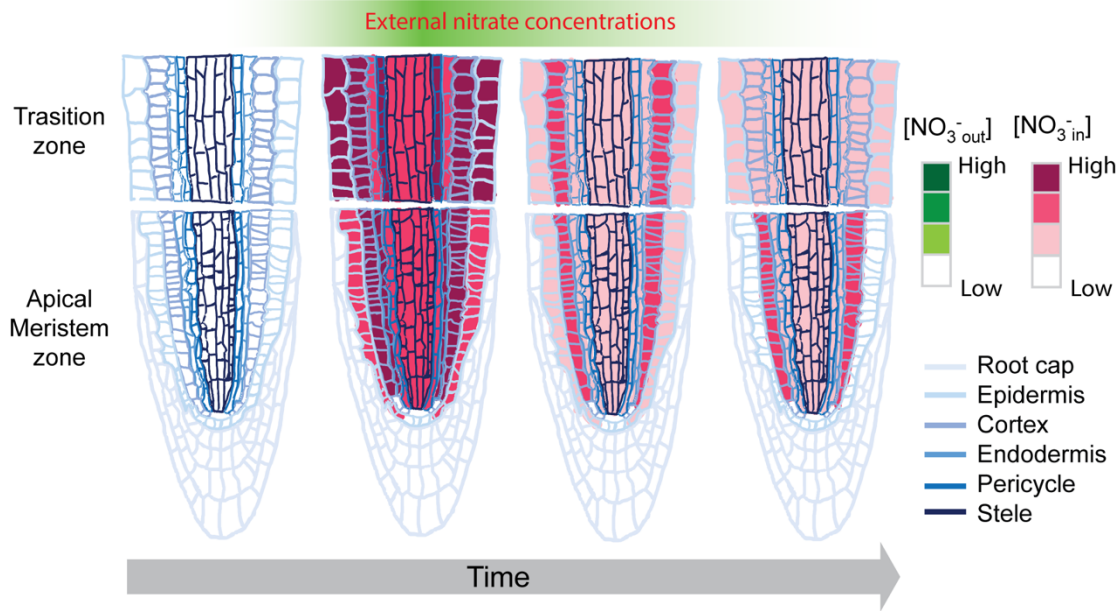

**Fig. S8. Nitrate distribution in the root before and after treatment with exogenous  $\text{NO}_3^-$ .** The  $\text{NO}_3^-$  distribution in the meristem and transition zones is based on the results in the Fig. 4.  $[\text{NO}_3^-]_{\text{out}}$  indicates the concentration of  $\text{NO}_3^-$  outside the cells;  $[\text{NO}_3^-]_{\text{in}}$  indicates inside the cells.

**Movie S1.**

The movie shows a time-course treatment of nlsNiMet3.0 in root with  $\text{NO}_3^-$ . The movie shows the emission ratio ( $\text{DxAm}/\text{DxDm}$ ). Scale bar, 25  $\mu\text{m}$ .
